# Supplementary material
Source: Research Square preprint supplement (doi:10.21203/rs.3.rs-8494372/v1)
Supplement: Supplementary file 1 [file 10756345d4ccc62e59342820.docx]

Table S11. validation set Feature Importance Analysis Table

| **Feature** | **Gain** | **Cover** | **Frequency** |
| --- | --- | --- | --- |
| Lac_max | 0.207 | 0.194 | 0.121 |
| Age | 0.104 | 0.091 | 0.081 |
| WBCmin | 0.090 | 0.090 | 0.099 |
| CRRT | 0.079 | 0.076 | 0.023 |
| BMI | 0.060 | 0.059 | 0.074 |
| PCO2 | 0.059 | 0.059 | 0.074 |
| HRmax | 0.059 | 0.070 | 0.077 |
| Sodium | 0.056 | 0.064 | 0.067 |
| APTTmin | 0.054 | 0.046 | 0.069 |
| Lac | 0.053 | 0.061 | 0.069 |
| PO2 | 0.046 | 0.061 | 0.059 |
| PLT | 0.043 | 0.045 | 0.058 |
| OI | 0.042 | 0.042 | 0.053 |
| INR | 0.034 | 0.024 | 0.049 |
| ARF | 0.008 | 0.006 | 0.014 |
| Stroke | 0.003 | 0.005 | 0.004 |
| Shock | 0.002 | 0.005 | 0.010 |

Abbreviations and Notes: Unless otherwise specified, variables refer to values within 24 hours of admission. The suffix "max" indicates the maximum value of the variable during hospitalization, and the suffix "min" indicates the minimum value during hospitalization.CRRT: Continuous Renal Replacement Therapy;Lac: Lactate;OI: Oxygenation Index;PO₂: Partial Pressure of Oxygen;PCO₂: Partial Pressure of Carbon Dioxide;BMI: Body Mass Index;WBC: White Blood Cell;HR: Heart Rate;PLT: Platelet;APTT: Activated Partial Thromboplastin Time;INR: International Normalized Ratio;ARF: Acute Renal Failure;IMV: Invasive Mechanical Ventilation
