# Supplementary material
Source: Research Square preprint supplement (doi:10.21203/rs.3.rs-8494372/v1)
Supplement: Supplementary file 2 [file 1bdda9c88ff63b19ae4ed849.docx]

Table S8. Comparative Analysis of Baseline Characteristics Between the Training and Validation Sets in the MIMIC-IV Database

| **Variables** | **Training（n=1145）** | **Validation（n=492）** | ***p* value** |
| --- | --- | --- | --- |
| Demographic Information |  |  |  |
| Gender/(male)[No.(%)] | 680 (59.4%) | 299 (60.8%) | 0.639 |
| Age/years | 69.00 (58.00-79.00) | 69.00 (59.00-79.00) | 0.554 |
| BMI/kg·m-2 | 27.30 (23.71-31.78) | 27.69 (23.88-32.40) | 0.115 |
| Comorbidities |  |  |  |
| HBP/[No.(%)] | 472 (41.2%) | 204 (41.5%) | 0.971 |
| T2DM/[No.(%)] | 343 (30%) | 148 (30.1%) | 1.000 |
| HF/[No.(%)] | 395 (34.5%) | 191 (38.8%) | 0.106 |
| MI/[No.(%)] | 136 (11.9%) | 74 (15%) | 0.094 |
| CKD/[No.(%)] | 222 (19.4%) | 105 (21.3%) | 0.402 |
| ARF/[No.(%)] | 517 (45.2%) | 228 (46.3%) | 0.698 |
| Stroke/[No.(%)] | 91 (7.9%) | 33 (6.7%) | 0.443 |
| HLP/[No.(%)] | 472 (41.2%) | 194 (39.4%) | 0.534 |
| COPD/[No.(%)] | 107 (9.3%) | 46 (9.3%) | 1.000 |
| Shock/[No.(%)] | 342 (29.9%) | 154 (31.3%) | 0.604 |
| Laboratory Indicators |  |  |  |
| WBC/×10⁹·L⁻¹ | 11.75 (8.80-15.40) | 11.40 (8.40-15.28) | 0.257 |
| RBC/×1012·L⁻¹ | 3.57 (3.14-4.08) | 3.66 (3.14-4.14) | 0.229 |
| PLT/×10⁹·L⁻¹ | 184.00 (155.00-233.00) | 183.58 (155.92-232.17) | 0.883 |
| HGB/g·L⁻¹ | 10.60 (9.28-12.20) | 10.87 (9.39-12.35) | 0.198 |
| RDW/% | 14.40 (13.47-15.70) | 14.20 (13.35-15.43) | 0.038 |
| HCT/% | 32.10 (28.41-36.92) | 33.02 (28.55-37.08) | 0.194 |
| Sodium/(mmol·L⁻¹) | 138.33 (136.00-140.67) | 138.30 ± 3.48 | 0.572 |
| Potassium/(mmol·L⁻¹) | 4.17 (3.85-4.53) | 4.15 (3.85-4.50) | 0.798 |
| Calcium/(mmol·L⁻¹) | 8.27 ± 0.66 | 8.35 ± 0.67 | 0.019 |
| pH value | 7.38 (7.34-7.42) | 7.38 (7.34-7.42) | 0.486 |
| PCO2/mmHg | 39.95 (36.00-44.23) | 40.06 ± 6.37 | 0.972 |
| PO2/mmHg | 123.00 (73.43-201.50) | 121.06 (75.59-201.87) | 0.900 |
| Lac/(mmol·L⁻¹) | 1.70 (1.25-2.23) | 1.73 (1.28-2.20) | 0.845 |
| OI | 570.38 (348.65-897.62) | 552.88 (341.67-902.37) | 0.734 |
| PT/s | 13.30 (12.30-14.70) | 13.20 (12.20-14.56) | 0.288 |
| APTT/s | 30.05 (26.80-34.61) | 30.05 (26.80-34.70) | 0.945 |
| INR | 1.20 (1.10-1.31) | 1.20 (1.10-1.31) | 0.314 |
| TBIL/(mg·dL⁻¹) | 0.60 (0.40-0.80) | 0.57 (0.40-0.79) | 0.874 |
| BUN/(mg·dL⁻¹) | 20.00 (14.00-29.67) | 20.00 (14.33-28.00) | 0.984 |
| Scr/(mg·dL⁻¹) | 0.95 (0.73-1.37) | 1.00 (0.79-1.36) | 0.080 |
| Glucose/(mg·dL⁻¹) | 128.00 (110.00-153.78) | 131.00 (107.92-154.77) | 0.615 |
| Vital Signs |  |  |  |
| HR/beats per minute | 86.68 (74.59-98.73) | 85.23 (74.56-97.44) | 0.211 |
| Temperature/℃ | 36.86 (36.65-37.12) | 36.83 (36.63-37.15) | 0.783 |
| MAP/mmHg | 79.83 (72.92-88.82) | 80.11 (72.30-87.81) | 0.810 |
| Medical Interventions |  |  |  |
| CRRT/[No.(%)] | 87 (7.6%) | 42 (8.5%) | 0.585 |
| IMV/[No.(%)] | 1012 (88.4%) | 422 (85.8%) | 0.165 |
| Use of Heparin/[No.(%)] | 786 (68.6%) | 329 (66.9%) | 0.516 |
| Use of Vasoactive Drugs/[No.(%)] | 372 (32.5%) | 144 (29.3%) | 0.219 |
| Scoring Systems |  |  |  |
| SOFA Score | 3.00 (2.00-4.00) | 3.00 (2.00-4.00) | 0.358 |
| SAPS III Score | 35.00 (28.00-43.00) | 35.50 (28.00-43.00) | 0.756 |
| Dynamic Indicators |  |  |  |
| HRmin/beats per minute | 77.46 (68.35-87.56) | 76.86 (67.81-87.47) | 0.557 |
| HRmax/beats per minute | 95.76 ± 15.86 | 95.44 ± 15.37 | 0.701 |
| Tmin/℃ | 36.88 (36.69-37.07) | 36.87 (36.70-37.08) | 0.629 |
| Tmax/℃ | 37.10 (36.83-37.53) | 37.16 (36.83-37.57) | 0.183 |
| MAPmin/mmHg | 74.52 (68.30-82.20) | 73.94 (68.36-82.19) | 0.592 |
| MAPmax/mmHg | 86.33 (78.00-96.02) | 87.02 (78.29-96.42) | 0.461 |
| OImin | 357.14 (214.29-498.43) | 347.62 (207.14-476.89) | 0.144 |
| OImax | 584.52 (376.19-823.81) | 601.19 (385.71-818.16) | 0.803 |
| WBCmin/×10⁹·L⁻¹ | 8.00 (6.10-10.47) | 8.00 (6.04-10.40) | 0.886 |
| WBCmax/×10⁹·L⁻¹ | 14.60 (11.00-18.60) | 14.00 (11.09-18.62) | 0.784 |
| PLTmin/×10⁹·L⁻¹ | 124.00 (97.00-167.57) | 124.00 (95.00-172.00) | 0.789 |
| PLTmax/×10⁹·L⁻¹ | 223.00 (173.67-293.00) | 218.25 (174.00-282.00) | 0.673 |
| PTmin/s | 12.90 (11.95-14.25) | 12.82 (12.00-14.00) | 0.475 |
| PTmax/s | 15.70 (14.15-17.40) | 15.60 (14.00-17.42) | 0.67 |
| INRmin | 1.20 (1.10-1.30) | 1.17 (1.10-1.30) | 0.542 |
| INRmax | 1.40 (1.30-1.60) | 1.40 (1.30-1.60) | 0.573 |
| APTTmin/s | 28.60 (25.90-31.88) | 28.33 (25.99-31.81) | 0.731 |
| APTTmax/s | 38.10 (31.00-60.80) | 38.73 (31.00-62.05) | 0.976 |
| Scr_min/(mg·dL⁻¹) | 0.80 (0.60-1.10) | 0.90 (0.61-1.15) | 0.029 |
| Scr_max/(mg·dL⁻¹) | 1.20 (0.85-1.80) | 1.30 (0.90-1.81) | 0.162 |
| TBILmin/(mg·dL⁻¹) | 0.50 (0.30-0.70) | 0.50 (0.30-0.70) | 0.896 |
| TBILmax/(mg·dL⁻¹) | 0.70 (0.48-1.03) | 0.72 (0.43-1.00) | 0.969 |
| Lac_min/(mmol·L⁻¹) | 1.25 (0.95-1.68) | 1.26 (1.00-1.63) | 0.898 |
| Lac_max/(mmol·L⁻¹) | 1.85 (1.30-2.57) | 1.90 (1.35-2.73) | 0.089 |

Abbreviations and Notes: Unless otherwise specified, variables refer to values within 24 hours of admission. The suffix "max" indicates the maximum value of the variable during hospitalization, and the suffix "min" indicates the minimum value during hospitalization.T:Temperature;BMI: Body Mass Index;HBP: Hypertension;T2DM: Type 2 Diabetes Mellitus;HF: Heart Failure;MI: Myocardial Infarction;CKD: Chronic Kidney Disease;ARF: Acute Renal Failure;HLP: Hyperlipidemia;COPD: Chronic Obstructive Pulmonary Disease;WBC: White Blood Cell;RBC: Red Blood Cell;PLT: Platelet;HGB: Hemoglobin;RDW: Red Cell Distribution Width;HCT: Hematocrit;PH: Potential of Hydrogen;PCO₂: Partial Pressure of Carbon Dioxide;PO₂: Partial Pressure of Oxygen;Lac: Lactate;OI: Oxygenation Index;PT: Prothrombin Time;APTT: Activated Partial Thromboplastin Time;INR: International Normalized Ratio;TBIL: Total Bilirubin;BUN: Blood Urea Nitrogen;Scr: Serum Creatinine;HR: Heart Rate;MAP: Mean Arterial Pressure;CRRT: Continuous Renal Replacement Therapy;IMV: Invasive Mechanical Ventilation;SOFA: Sequential Organ Failure Assessment Score;SAPS III: Simplified Acute Physiology Score III
