# Supplementary material
Source: Research Square preprint supplement (doi:10.21203/rs.3.rs-8494372/v1)
Supplement: Supplementary file 3 [file 3d6358e78b05ca75e3a8f5ec.docx]

**Table S6. Sensitivity Analysis of Imputation Frequency Variations in the MICE Method**(eICU-CRD)

| **term** | **m=5** | | | | **m=10** | | | | **m=20** | | | |
| --- | --- | --- | --- | --- | --- | --- | --- | --- | --- | --- | --- | --- |
| **estimate** | **std.error** | **lower** | **upper** | **estimate** | **std.error** | **lower** | **upper** | **estimate** | **std.error** | **lower** | **upper** |
| (Intercept) | 1.61E+01 | 2.34E+01 | -2.98E+01 | 6.19E+01 | 2.81E+01 | 2.40E+01 | -1.90E+01 | 7.52E+01 | 2.26E+01 | 2.21E+01 | -2.08E+01 | 6.59E+01 |
| Weight | -1.77E-02 | 9.03E-03 | -3.54E-02 | 1.73E-05 | -1.68E-02 | 8.79E-03 | -3.40E-02 | 4.22E-04 | -1.84E-02 | 8.97E-03 | -3.60E-02 | -8.15E-04 |
| Height | -7.34E-03 | 5.80E-03 | -1.87E-02 | 4.02E-03 | -6.36E-03 | 5.45E-03 | -1.71E-02 | 4.32E-03 | -7.39E-03 | 5.53E-03 | -1.82E-02 | 3.45E-03 |
| HR | -2.87E-02 | 1.52E-02 | -5.85E-02 | 1.13E-03 | -2.77E-02 | 1.45E-02 | -5.61E-02 | 8.02E-04 | -2.90E-02 | 1.47E-02 | -5.77E-02 | -2.71E-04 |
| Temperature | 2.65E-01 | 3.31E-01 | -3.83E-01 | 9.13E-01 | 3.16E-01 | 3.50E-01 | -3.70E-01 | 1.00E+00 | 3.28E-01 | 3.44E-01 | -3.47E-01 | 1.00E+00 |
| MAP | 4.19E-02 | 1.88E-02 | 5.02E-03 | 7.87E-02 | 4.22E-02 | 1.80E-02 | 6.94E-03 | 7.76E-02 | 4.33E-02 | 1.94E-02 | 5.20E-03 | 8.14E-02 |
| WBC | -5.25E-02 | 2.81E-02 | -1.08E-01 | 2.53E-03 | -4.35E-02 | 2.80E-02 | -9.84E-02 | 1.15E-02 | -4.60E-02 | 2.81E-02 | -1.01E-01 | 9.00E-03 |
| RBC | -4.13E-01 | 4.04E-01 | -1.20E+00 | 3.78E-01 | -3.95E-01 | 4.14E-01 | -1.21E+00 | 4.16E-01 | -4.07E-01 | 4.10E-01 | -1.21E+00 | 3.97E-01 |
| PLT | 4.52E-03 | 2.62E-03 | -6.18E-04 | 9.65E-03 | 4.66E-03 | 2.67E-03 | -5.71E-04 | 9.89E-03 | 4.33E-03 | 2.66E-03 | -8.84E-04 | 9.54E-03 |
| HGB | -2.88E-01 | 3.29E-01 | -9.33E-01 | 3.58E-01 | -3.58E-01 | 3.53E-01 | -1.05E+00 | 3.34E-01 | -3.15E-01 | 3.40E-01 | -9.81E-01 | 3.51E-01 |
| RDW | 1.60E-02 | 5.62E-02 | -9.41E-02 | 1.26E-01 | 1.21E-02 | 5.94E-02 | -1.04E-01 | 1.29E-01 | 2.42E-02 | 6.58E-02 | -1.05E-01 | 1.53E-01 |
| HCT | 1.31E-01 | 1.19E-01 | -1.03E-01 | 3.65E-01 | 1.48E-01 | 1.26E-01 | -9.92E-02 | 3.95E-01 | 1.36E-01 | 1.19E-01 | -9.75E-02 | 3.69E-01 |
| Sodium | -3.43E-02 | 2.35E-02 | -8.05E-02 | 1.18E-02 | -3.56E-02 | 2.44E-02 | -8.34E-02 | 1.21E-02 | -3.91E-02 | 2.47E-02 | -8.74E-02 | 9.29E-03 |
| Potassium | -3.24E-01 | 2.38E-01 | -7.90E-01 | 1.41E-01 | -3.86E-01 | 2.47E-01 | -8.70E-01 | 9.72E-02 | -4.20E-01 | 2.50E-01 | -9.10E-01 | 7.01E-02 |
| Calcium | 1.50E-01 | 1.68E-01 | -1.78E-01 | 4.79E-01 | 9.89E-02 | 1.77E-01 | -2.47E-01 | 4.45E-01 | 1.62E-01 | 1.72E-01 | -1.74E-01 | 4.99E-01 |
| Glucose | 5.01E-04 | 2.44E-03 | -4.28E-03 | 5.28E-03 | -5.40E-05 | 2.42E-03 | -4.79E-03 | 4.68E-03 | 2.34E-04 | 2.69E-03 | -5.04E-03 | 5.51E-03 |
| PH | 1.86E+00 | 2.37E+00 | -2.78E+00 | 6.50E+00 | 1.27E-01 | 2.58E+00 | -4.92E+00 | 5.18E+00 | 9.99E-01 | 2.45E+00 | -3.79E+00 | 5.79E+00 |
| PCO2 | 5.93E-03 | 1.51E-02 | -2.36E-02 | 3.55E-02 | 4.43E-03 | 1.67E-02 | -2.84E-02 | 3.72E-02 | 2.64E-03 | 1.59E-02 | -2.85E-02 | 3.38E-02 |
| PO2 | 1.33E-04 | 3.77E-03 | -7.26E-03 | 7.53E-03 | -9.09E-04 | 3.51E-03 | -7.79E-03 | 5.97E-03 | -7.06E-04 | 3.53E-03 | -7.62E-03 | 6.21E-03 |
| Lac | 1.34E-01 | 1.52E-01 | -1.65E-01 | 4.33E-01 | 8.72E-02 | 1.32E-01 | -1.71E-01 | 3.45E-01 | 1.33E-01 | 1.51E-01 | -1.62E-01 | 4.28E-01 |
| PT | 1.07E-01 | 9.41E-02 | -7.76E-02 | 2.91E-01 | 1.28E-01 | 9.86E-02 | -6.51E-02 | 3.22E-01 | 1.22E-01 | 9.90E-02 | -7.20E-02 | 3.16E-01 |
| APTT | -1.86E-02 | 1.98E-02 | -5.74E-02 | 2.02E-02 | -1.49E-02 | 1.84E-02 | -5.11E-02 | 2.12E-02 | -1.18E-02 | 2.11E-02 | -5.33E-02 | 2.96E-02 |
| INR | -1.05E+00 | 8.35E-01 | -2.69E+00 | 5.88E-01 | -1.19E+00 | 8.44E-01 | -2.85E+00 | 4.63E-01 | -1.17E+00 | 8.57E-01 | -2.85E+00 | 5.12E-01 |
| TBIL | -2.55E-01 | 2.68E-01 | -7.79E-01 | 2.70E-01 | -3.01E-01 | 2.41E-01 | -7.74E-01 | 1.72E-01 | -4.18E-01 | 2.71E-01 | -9.49E-01 | 1.14E-01 |
| BUN | 1.54E-02 | 9.26E-03 | -2.80E-03 | 3.35E-02 | 1.45E-02 | 8.92E-03 | -3.01E-03 | 3.20E-02 | 1.44E-02 | 9.18E-03 | -3.55E-03 | 3.24E-02 |
| Scr | -2.51E-01 | 5.29E-01 | -1.29E+00 | 7.86E-01 | -1.32E-01 | 4.54E-01 | -1.02E+00 | 7.59E-01 | -1.38E-01 | 5.11E-01 | -1.14E+00 | 8.64E-01 |
| OI | 8.89E-05 | 7.37E-05 | -5.54E-05 | 2.33E-04 | 9.56E-05 | 8.37E-05 | -6.85E-05 | 2.60E-04 | 9.89E-05 | 8.11E-05 | -6.01E-05 | 2.58E-04 |
| SAPSⅢ | -1.67E-03 | 8.48E-03 | -1.83E-02 | 1.49E-02 | -2.64E-03 | 8.56E-03 | -1.94E-02 | 1.41E-02 | -1.82E-03 | 8.89E-03 | -1.92E-02 | 1.56E-02 |
| HRmin | 1.25E-02 | 1.35E-02 | -1.39E-02 | 3.90E-02 | 9.78E-03 | 1.34E-02 | -1.64E-02 | 3.60E-02 | 8.84E-03 | 1.28E-02 | -1.62E-02 | 3.39E-02 |
| HRmax | 3.41E-02 | 1.54E-02 | 3.96E-03 | 6.43E-02 | 3.43E-02 | 1.49E-02 | 4.99E-03 | 6.35E-02 | 3.98E-02 | 1.47E-02 | 1.10E-02 | 6.86E-02 |
| Tmin | -9.47E-01 | 3.62E-01 | -1.66E+00 | -2.37E-01 | -9.17E-01 | 4.02E-01 | -1.70E+00 | -1.30E-01 | -9.54E-01 | 3.65E-01 | -1.67E+00 | -2.38E-01 |
| Tmax | 3.42E-02 | 3.00E-01 | -5.54E-01 | 6.22E-01 | 6.11E-03 | 2.97E-01 | -5.76E-01 | 5.88E-01 | -2.38E-03 | 3.08E-01 | -6.05E-01 | 6.00E-01 |
| MAPmin | -5.50E-02 | 2.13E-02 | -9.68E-02 | -1.32E-02 | -5.09E-02 | 1.94E-02 | -8.89E-02 | -1.30E-02 | -5.26E-02 | 1.98E-02 | -9.14E-02 | -1.39E-02 |
| MAPmax | -2.32E-02 | 1.65E-02 | -5.55E-02 | 9.06E-03 | -2.67E-02 | 1.66E-02 | -5.92E-02 | 5.82E-03 | -2.73E-02 | 1.74E-02 | -6.15E-02 | 6.83E-03 |
| OImin | -5.14E-05 | 8.82E-05 | -2.24E-04 | 1.22E-04 | -4.66E-05 | 8.82E-05 | -2.19E-04 | 1.26E-04 | -4.85E-05 | 8.94E-05 | -2.24E-04 | 1.27E-04 |
| OImax | -4.01E-06 | 5.87E-05 | -1.19E-04 | 1.11E-04 | -1.11E-05 | 6.74E-05 | -1.43E-04 | 1.21E-04 | -3.39E-06 | 6.36E-05 | -1.28E-04 | 1.21E-04 |
| WBCmin | 1.38E-01 | 3.70E-02 | 6.52E-02 | 2.10E-01 | 1.29E-01 | 3.65E-02 | 5.77E-02 | 2.01E-01 | 1.36E-01 | 3.61E-02 | 6.49E-02 | 2.06E-01 |
| WBCmax | -7.69E-03 | 2.39E-02 | -5.45E-02 | 3.92E-02 | -1.19E-02 | 2.37E-02 | -5.83E-02 | 3.44E-02 | -1.07E-02 | 2.45E-02 | -5.87E-02 | 3.72E-02 |
| PLTmin | -1.24E-04 | 2.55E-03 | -5.13E-03 | 4.88E-03 | 2.96E-04 | 2.61E-03 | -4.82E-03 | 5.41E-03 | 6.91E-04 | 2.57E-03 | -4.34E-03 | 5.73E-03 |
| PLTmax | -2.31E-03 | 2.48E-03 | -7.17E-03 | 2.55E-03 | -2.80E-03 | 2.56E-03 | -7.82E-03 | 2.22E-03 | -2.95E-03 | 2.52E-03 | -7.89E-03 | 1.99E-03 |
| PTmin | 1.26E-01 | 1.64E-01 | -1.95E-01 | 4.47E-01 | 9.05E-02 | 1.67E-01 | -2.37E-01 | 4.18E-01 | 1.32E-01 | 1.44E-01 | -1.51E-01 | 4.14E-01 |
| PTmax | -1.77E-01 | 1.07E-01 | -3.86E-01 | 3.33E-02 | -1.42E-01 | 8.26E-02 | -3.04E-01 | 1.98E-02 | -1.59E-01 | 8.65E-02 | -3.28E-01 | 1.09E-02 |
| INRmin | -1.00E+00 | 1.46E+00 | -3.87E+00 | 1.87E+00 | -7.17E-01 | 1.46E+00 | -3.59E+00 | 2.15E+00 | -1.04E+00 | 1.37E+00 | -3.71E+00 | 1.64E+00 |
| INRmax | 1.49E+00 | 8.81E-01 | -2.34E-01 | 3.22E+00 | 1.17E+00 | 6.72E-01 | -1.46E-01 | 2.49E+00 | 1.33E+00 | 7.21E-01 | -8.70E-02 | 2.74E+00 |
| APTTmin | 2.27E-02 | 2.29E-02 | -2.22E-02 | 6.76E-02 | 1.70E-02 | 2.13E-02 | -2.47E-02 | 5.88E-02 | 1.92E-02 | 2.34E-02 | -2.66E-02 | 6.50E-02 |
| APTTmax | -9.21E-03 | 1.06E-02 | -3.00E-02 | 1.15E-02 | -6.55E-03 | 1.09E-02 | -2.79E-02 | 1.48E-02 | -8.96E-03 | 1.12E-02 | -3.10E-02 | 1.30E-02 |
| Scr_min | 1.19E-01 | 5.72E-01 | -1.00E+00 | 1.24E+00 | -1.84E-02 | 5.00E-01 | -9.98E-01 | 9.61E-01 | -1.47E-02 | 5.42E-01 | -1.08E+00 | 1.05E+00 |
| Scr_max | -1.30E-02 | 1.61E-01 | -3.29E-01 | 3.03E-01 | 4.23E-04 | 1.56E-01 | -3.06E-01 | 3.07E-01 | 5.89E-03 | 1.57E-01 | -3.01E-01 | 3.13E-01 |
| TBILmin | -1.37E-01 | 1.76E-01 | -4.82E-01 | 2.08E-01 | -1.05E-01 | 1.59E-01 | -4.16E-01 | 2.05E-01 | -1.07E-01 | 1.89E-01 | -4.77E-01 | 2.62E-01 |
| TBILmax | 2.48E-01 | 1.26E-01 | 1.68E-03 | 4.94E-01 | 2.31E-01 | 1.26E-01 | -1.55E-02 | 4.77E-01 | 2.46E-01 | 1.50E-01 | -4.90E-02 | 5.40E-01 |
| Lac_min | -1.09E-01 | 1.84E-01 | -4.71E-01 | 2.52E-01 | -6.30E-02 | 1.89E-01 | -4.34E-01 | 3.08E-01 | -1.01E-01 | 1.90E-01 | -4.73E-01 | 2.72E-01 |
| Lac_max | 1.05E-01 | 1.32E-01 | -1.53E-01 | 3.63E-01 | 1.26E-01 | 1.30E-01 | -1.29E-01 | 3.81E-01 | 1.24E-01 | 1.39E-01 | -1.48E-01 | 3.96E-01 |

Abbreviations and Notes: Unless otherwise specified, all variables are measured within 24 hours of admission. The suffix 'max' denotes the maximum value of the variable during hospitalization, and 'min' denotes the minimum value.HR: Heart Rate; MAP: Mean Arterial Pressure; WBC: White Blood Cell; RBC: Red Blood Cell; PLT: Platelet; HGB: Hemoglobin; RDW: Red Cell Distribution Width; HCT: Hematocrit; PH: pH; PCO2: Partial Pressure of Carbon Dioxide; PO2: Partial Pressure of Oxygen; Lac: Lactate; PT: Prothrombin Time; APTT: Activated Partial Thromboplastin Time; INR: International Normalized Ratio; TBIL: Total Bilirubin; BUN: Blood Urea Nitrogen; Scr: Serum Creatinine; OI: Oxygenation Index; SAPS III: Simplified Acute Physiology Score III. The judgment criterion is as follows: if the overlap of confidence intervals generated by different 'm' values exceeds 70%, it is considered to indicate low sensitivity. The overlap of confidence intervals calculated for all variables exceeded 70%.
