# Supplementary material
Source: Research Square preprint supplement (doi:10.21203/rs.3.rs-8494372/v1)
Supplement: Supplementary file 4 [file 53487fd24748b0a776d3a72a.docx]

**Table S4. Sensitivity Analysis of Imputation Frequency Variations in the MICE Method**(MIMIC-IV)

| **term** | **m=5** | | | | **m=10** | | | | **m=20** | | | |
| --- | --- | --- | --- | --- | --- | --- | --- | --- | --- | --- | --- | --- |
| **estimate** | **std.error** | **lower** | **upper** | **estimate** | **std.error** | **lower** | **upper** | **estimate** | **std.error** | **lower** | **upper** |
| (Intercept) | -5.43E+00 | 1.08E+01 | -2.66E+01 | 1.57E+01 | -1.25E+00 | 1.03E+01 | -2.14E+01 | 1.89E+01 | -1.99E+00 | 1.03E+01 | -2.23E+01 | 1.83E+01 |
| Weight | -1.30E-02 | 3.56E-03 | -1.99E-02 | -5.98E-03 | -1.37E-02 | 3.56E-03 | -2.07E-02 | -6.78E-03 | -1.37E-02 | 3.60E-03 | -2.07E-02 | -6.59E-03 |
| Height | -3.56E-03 | 8.12E-03 | -1.95E-02 | 1.24E-02 | -2.62E-03 | 8.73E-03 | -1.97E-02 | 1.45E-02 | -1.86E-03 | 8.83E-03 | -1.92E-02 | 1.54E-02 |
| HR | -2.72E-02 | 7.43E-03 | -4.18E-02 | -1.27E-02 | -2.66E-02 | 7.38E-03 | -4.10E-02 | -1.21E-02 | -2.63E-02 | 7.38E-03 | -4.08E-02 | -1.19E-02 |
| Temperature | -1.39E-01 | 9.96E-02 | -3.34E-01 | 5.65E-02 | -1.24E-01 | 9.19E-02 | -3.04E-01 | 5.59E-02 | -1.33E-01 | 9.72E-02 | -3.23E-01 | 5.77E-02 |
| MAP | 2.18E-02 | 8.21E-03 | 5.70E-03 | 3.79E-02 | 2.26E-02 | 8.99E-03 | 5.02E-03 | 4.03E-02 | 2.20E-02 | 8.35E-03 | 5.61E-03 | 3.83E-02 |
| WBC | 1.66E-02 | 9.90E-03 | -2.76E-03 | 3.61E-02 | 1.62E-02 | 9.83E-03 | -3.05E-03 | 3.55E-02 | 1.58E-02 | 9.86E-03 | -3.52E-03 | 3.51E-02 |
| RBC | -6.64E-01 | 2.69E-01 | -1.19E+00 | -1.37E-01 | -6.25E-01 | 2.71E-01 | -1.16E+00 | -9.45E-02 | -6.12E-01 | 2.62E-01 | -1.13E+00 | -9.81E-02 |
| PLT | 9.06E-04 | 7.63E-04 | -5.90E-04 | 2.40E-03 | 9.04E-04 | 7.90E-04 | -6.43E-04 | 2.45E-03 | 9.07E-04 | 7.85E-04 | -6.33E-04 | 2.45E-03 |
| HGB | -8.18E-02 | 1.61E-01 | -3.97E-01 | 2.33E-01 | -1.05E-01 | 1.53E-01 | -4.04E-01 | 1.93E-01 | -1.22E-01 | 1.53E-01 | -4.22E-01 | 1.78E-01 |
| RDW | -2.00E-02 | 3.83E-02 | -9.51E-02 | 5.51E-02 | -2.16E-02 | 3.89E-02 | -9.78E-02 | 5.46E-02 | -2.40E-02 | 3.87E-02 | -9.99E-02 | 5.19E-02 |
| HCT | 1.16E-01 | 5.99E-02 | -1.48E-03 | 2.33E-01 | 1.21E-01 | 5.74E-02 | 8.00E-03 | 2.33E-01 | 1.26E-01 | 5.70E-02 | 1.40E-02 | 2.37E-01 |
| Sodium | 1.66E-02 | 1.42E-02 | -1.12E-02 | 4.44E-02 | 1.79E-02 | 1.38E-02 | -9.12E-03 | 4.48E-02 | 1.67E-02 | 1.40E-02 | -1.07E-02 | 4.40E-02 |
| Potassium | 3.67E-02 | 1.33E-01 | -2.24E-01 | 2.98E-01 | 2.66E-02 | 1.33E-01 | -2.35E-01 | 2.88E-01 | 2.21E-02 | 1.33E-01 | -2.39E-01 | 2.83E-01 |
| Calcium | -1.87E-01 | 1.01E-01 | -3.85E-01 | 1.17E-02 | -1.94E-01 | 1.00E-01 | -3.91E-01 | 2.84E-03 | -1.99E-01 | 1.01E-01 | -3.97E-01 | -1.47E-03 |
| Glucose | 6.82E-04 | 1.06E-03 | -1.40E-03 | 2.77E-03 | 7.56E-04 | 1.08E-03 | -1.36E-03 | 2.87E-03 | 7.36E-04 | 1.07E-03 | -1.37E-03 | 2.84E-03 |
| PH | 6.48E-01 | 1.35E+00 | -2.00E+00 | 3.30E+00 | 7.68E-02 | 1.31E+00 | -2.49E+00 | 2.64E+00 | 2.24E-01 | 1.31E+00 | -2.35E+00 | 2.80E+00 |
| PCO2 | 8.81E-03 | 9.40E-03 | -9.61E-03 | 2.72E-02 | 4.77E-03 | 8.79E-03 | -1.25E-02 | 2.20E-02 | 4.55E-03 | 9.03E-03 | -1.31E-02 | 2.22E-02 |
| PO2 | -2.66E-03 | 2.25E-03 | -7.07E-03 | 1.75E-03 | -2.76E-03 | 2.20E-03 | -7.08E-03 | 1.55E-03 | -2.98E-03 | 2.38E-03 | -7.65E-03 | 1.70E-03 |
| Lac | -1.53E-01 | 8.36E-02 | -3.16E-01 | 1.13E-02 | -2.02E-01 | 9.53E-02 | -3.89E-01 | -1.54E-02 | -2.11E-01 | 9.45E-02 | -3.96E-01 | -2.55E-02 |
| PT | -5.13E-02 | 2.79E-01 | -5.98E-01 | 4.95E-01 | 5.76E-02 | 2.77E-01 | -4.84E-01 | 6.00E-01 | 4.88E-02 | 2.67E-01 | -4.74E-01 | 5.71E-01 |
| APTT | -1.32E-03 | 4.25E-03 | -9.64E-03 | 7.00E-03 | -1.04E-04 | 4.35E-03 | -8.63E-03 | 8.42E-03 | 4.82E-04 | 4.20E-03 | -7.74E-03 | 8.71E-03 |
| INR | -7.10E-02 | 2.95E+00 | -5.85E+00 | 5.71E+00 | -1.27E+00 | 2.90E+00 | -6.96E+00 | 4.42E+00 | -1.20E+00 | 2.79E+00 | -6.66E+00 | 4.27E+00 |
| TBIL | -1.73E-01 | 1.23E-01 | -4.13E-01 | 6.82E-02 | -1.90E-01 | 1.28E-01 | -4.40E-01 | 6.01E-02 | -2.00E-01 | 1.20E-01 | -4.36E-01 | 3.60E-02 |
| BUN | 2.45E-02 | 4.29E-03 | 1.61E-02 | 3.29E-02 | 2.39E-02 | 4.32E-03 | 1.54E-02 | 3.24E-02 | 2.43E-02 | 4.36E-03 | 1.57E-02 | 3.28E-02 |
| Scr | -1.67E-01 | 6.44E-02 | -2.93E-01 | -4.07E-02 | -1.69E-01 | 6.47E-02 | -2.96E-01 | -4.26E-02 | -1.73E-01 | 6.52E-02 | -3.01E-01 | -4.48E-02 |
| OI | -2.62E-04 | 5.24E-04 | -1.29E-03 | 7.66E-04 | -2.53E-04 | 5.30E-04 | -1.29E-03 | 7.87E-04 | -2.10E-04 | 5.38E-04 | -1.26E-03 | 8.44E-04 |
| HRmin | 4.63E-03 | 7.67E-03 | -1.04E-02 | 1.97E-02 | 4.28E-03 | 7.70E-03 | -1.08E-02 | 1.94E-02 | 3.61E-03 | 7.64E-03 | -1.14E-02 | 1.86E-02 |
| HRmax | 3.83E-02 | 6.38E-03 | 2.58E-02 | 5.09E-02 | 3.81E-02 | 6.52E-03 | 2.53E-02 | 5.08E-02 | 3.80E-02 | 6.48E-03 | 2.53E-02 | 5.07E-02 |
| Tmin | 2.70E-02 | 4.44E-02 | -6.01E-02 | 1.14E-01 | 2.23E-02 | 4.01E-02 | -5.64E-02 | 1.01E-01 | 2.18E-02 | 4.00E-02 | -5.66E-02 | 1.00E-01 |
| Tmax | 1.19E-02 | 2.90E-02 | -4.50E-02 | 6.87E-02 | 1.09E-02 | 2.87E-02 | -4.54E-02 | 6.71E-02 | 1.31E-02 | 2.94E-02 | -4.46E-02 | 7.08E-02 |
| MAPmin | -2.18E-02 | 8.83E-03 | -3.91E-02 | -4.54E-03 | -2.30E-02 | 8.86E-03 | -4.03E-02 | -5.61E-03 | -2.28E-02 | 8.76E-03 | -4.00E-02 | -5.63E-03 |
| MAPmax | -6.03E-03 | 4.69E-03 | -1.52E-02 | 3.17E-03 | -7.26E-03 | 6.38E-03 | -1.98E-02 | 5.25E-03 | -6.26E-03 | 5.69E-03 | -1.74E-02 | 4.89E-03 |
| OImin | -4.13E-04 | 4.95E-04 | -1.38E-03 | 5.57E-04 | -4.66E-04 | 4.87E-04 | -1.42E-03 | 4.90E-04 | -4.30E-04 | 4.85E-04 | -1.38E-03 | 5.21E-04 |
| OImax | -3.89E-04 | 3.18E-04 | -1.01E-03 | 2.35E-04 | -3.90E-04 | 2.92E-04 | -9.63E-04 | 1.83E-04 | -4.52E-04 | 3.00E-04 | -1.04E-03 | 1.36E-04 |
| PTmin | 1.91E-01 | 2.41E-01 | -2.82E-01 | 6.64E-01 | 1.39E-01 | 2.44E-01 | -3.40E-01 | 6.17E-01 | 1.53E-01 | 2.35E-01 | -3.08E-01 | 6.14E-01 |
| PTmax | 9.30E-02 | 4.97E-02 | -4.40E-03 | 1.90E-01 | 9.08E-02 | 5.26E-02 | -1.23E-02 | 1.94E-01 | 9.12E-02 | 5.11E-02 | -9.02E-03 | 1.91E-01 |
| INRmin | -1.06E+00 | 2.46E+00 | -5.88E+00 | 3.75E+00 | -5.42E-01 | 2.50E+00 | -5.45E+00 | 4.37E+00 | -6.51E-01 | 2.41E+00 | -5.37E+00 | 4.06E+00 |
| INRmax | -9.79E-01 | 5.29E-01 | -2.02E+00 | 5.88E-02 | -9.69E-01 | 5.58E-01 | -2.06E+00 | 1.25E-01 | -9.74E-01 | 5.45E-01 | -2.04E+00 | 9.51E-02 |
| APTTmin | 1.65E-02 | 8.52E-03 | -2.23E-04 | 3.32E-02 | 1.57E-02 | 8.70E-03 | -1.37E-03 | 3.27E-02 | 1.59E-02 | 8.62E-03 | -9.56E-04 | 3.29E-02 |
| APTTmax | 2.98E-03 | 3.09E-03 | -3.08E-03 | 9.04E-03 | 2.99E-03 | 3.19E-03 | -3.27E-03 | 9.25E-03 | 2.27E-03 | 3.15E-03 | -3.91E-03 | 8.45E-03 |
| TBILmin | 2.58E-01 | 1.66E-01 | -6.72E-02 | 5.83E-01 | 3.06E-01 | 1.57E-01 | -2.26E-03 | 6.14E-01 | 2.77E-01 | 1.56E-01 | -2.83E-02 | 5.83E-01 |
| TBILmax | -7.99E-03 | 6.59E-02 | -1.37E-01 | 1.21E-01 | -1.70E-02 | 6.27E-02 | -1.40E-01 | 1.06E-01 | -1.27E-02 | 6.48E-02 | -1.40E-01 | 1.14E-01 |
| Lac_min | 5.53E-02 | 1.14E-01 | -1.69E-01 | 2.79E-01 | 5.15E-02 | 1.20E-01 | -1.83E-01 | 2.86E-01 | 6.42E-02 | 1.18E-01 | -1.67E-01 | 2.96E-01 |
| Lac_max | 3.05E-01 | 6.02E-02 | 1.87E-01 | 4.23E-01 | 3.20E-01 | 5.51E-02 | 2.12E-01 | 4.28E-01 | 3.29E-01 | 5.48E-02 | 2.21E-01 | 4.36E-01 |

Abbreviations and Notes: Unless otherwise specified, all variables are measured within 24 hours of admission. The suffix 'max' denotes the maximum value of the variable during hospitalization, and 'min' denotes the minimum value.HR: Heart Rate; MAP: Mean Arterial Pressure; WBC: White Blood Cell; RBC: Red Blood Cell; PLT: Platelet; HGB: Hemoglobin; RDW: Red Cell Distribution Width; HCT: Hematocrit; PH: pH; PCO2: Partial Pressure of Carbon Dioxide; PO2: Partial Pressure of Oxygen; Lac: Lactate; PT: Prothrombin Time; APTT: Activated Partial Thromboplastin Time; INR: International Normalized Ratio; TBIL: Total Bilirubin; BUN: Blood Urea Nitrogen; Scr: Serum Creatinine; OI: Oxygenation Index. The criterion for judgment is as follows: if the overlap of confidence intervals generated by different 'm' is >70%, it is considered to have low sensitivity; the overlap of confidence intervals calculated for all variables was >70%.
