# Supplementary material
Source: Research Square preprint supplement (doi:10.21203/rs.3.rs-8494372/v1)
Supplement: Supplementary file 5 [file 68776ed78d60a3833076a61c.docx]

**Table S1-A. ICD-9/10 codes**

| ****Database**** | ICD code used |
| --- | --- |
| ****MIMIC-IV**** | A419, R6521, 99592, 99591, R6520, A4151, A4189, A4101, A4159, A4181, A4102, T8144XA, A4152, A408, A411, A4150, B377, A401, A414, A403, A4153, A400, A021, A409, A413, O85, A412, O0337, 67022, 67024, O8604, A327, A427, A5486, O0882, T8144XD, A227, O0387, O0487, 5721 |
| ****eICU-CRD**** | 800728, 800701, 800288, 900990, 900991, 900987, 900992, 900986, 900989 |

| **Table S1-B. SIC scoring system** | | | | |
| --- | --- | --- | --- | --- |
| Category | Parameter | 0 point | 1 point | 2 points |
| Prothrombin time | PT-INR | ≦1.2 | >1.2 | >1.4 |
| Coagulation (×109/L) | PLT | ≧150 | <150 | <100 |
| Total SOFA | SOFA four items | 0 | 1 | ≧2 |

Note: Total SOFA is the sum the four items (respiratory SOFA, cardiovascular SOFA, hepatic SOFA, renal SOFA).SIC was diagnosed when the total score is 4 or more.

**Abbreviations:** INR, international normalisation ratio; PT, prothrombin time; PLT, platelet count; SOFA, Sequential Organ Failure Assessment.
