# Supplementary material
Source: Research Square preprint supplement (doi:10.21203/rs.3.rs-8494372/v1)
Supplement: Supplementary file 6 [file 6dc36d3deac410522b291ca9.docx]

Table S5. Sensitivity Analysis of Different Imputation Methods in the MICE Algorithm(MIMIC-IV)

| **term** | **norm** | | | | **pmm** | | | | **cart** | | | |
| --- | --- | --- | --- | --- | --- | --- | --- | --- | --- | --- | --- | --- |
| **estimate** | **std.error** | **lower** | **upper** | **estimate** | **std.error** | **lower** | **upper** | **estimate** | **std.error** | **lower** | **upper** |
| (Intercept) | -1.75E+00 | 1.16E+01 | -2.44E+01 | 2.09E+01 | -2.70E+00 | 1.18E+01 | -2.58E+01 | 2.04E+01 | -1.58E+00 | 1.03E+01 | -2.18E+01 | 1.87E+01 |
| Weight | -1.41E-02 | 3.52E-03 | -2.10E-02 | -7.23E-03 | -1.47E-02 | 3.73E-03 | -2.20E-02 | -7.44E-03 | -1.33E-02 | 3.49E-03 | -2.02E-02 | -6.50E-03 |
| Height | -2.37E-03 | 9.21E-03 | -2.04E-02 | 1.57E-02 | -3.11E-04 | 9.13E-03 | -1.82E-02 | 1.76E-02 | -4.12E-03 | 8.72E-03 | -2.12E-02 | 1.30E-02 |
| HR | -2.79E-02 | 7.42E-03 | -4.25E-02 | -1.34E-02 | -2.78E-02 | 7.49E-03 | -4.25E-02 | -1.31E-02 | -2.80E-02 | 7.35E-03 | -4.24E-02 | -1.36E-02 |
| Temperature | -1.50E-01 | 1.07E-01 | -3.59E-01 | 5.94E-02 | -1.91E-01 | 1.41E-01 | -4.68E-01 | 8.53E-02 | -1.38E-01 | 1.14E-01 | -3.60E-01 | 8.51E-02 |
| MAP | 2.54E-02 | 9.23E-03 | 7.35E-03 | 4.35E-02 | 3.17E-02 | 1.02E-02 | 1.18E-02 | 5.16E-02 | 3.40E-02 | 9.47E-03 | 1.55E-02 | 5.26E-02 |
| WBC | 1.74E-02 | 9.99E-03 | -2.20E-03 | 3.70E-02 | 1.63E-02 | 9.74E-03 | -2.79E-03 | 3.54E-02 | 1.66E-02 | 9.73E-03 | -2.49E-03 | 3.56E-02 |
| RBC | -7.00E-01 | 2.72E-01 | -1.23E+00 | -1.67E-01 | -6.85E-01 | 2.63E-01 | -1.20E+00 | -1.70E-01 | -6.90E-01 | 2.65E-01 | -1.21E+00 | -1.70E-01 |
| PLT | 8.30E-04 | 7.84E-04 | -7.06E-04 | 2.37E-03 | 9.13E-04 | 7.86E-04 | -6.28E-04 | 2.45E-03 | 1.24E-03 | 7.89E-04 | -3.08E-04 | 2.79E-03 |
| HGB | -9.72E-02 | 1.50E-01 | -3.92E-01 | 1.98E-01 | -1.19E-01 | 1.50E-01 | -4.13E-01 | 1.75E-01 | -1.61E-01 | 1.48E-01 | -4.51E-01 | 1.30E-01 |
| RDW | -1.82E-02 | 3.93E-02 | -9.51E-02 | 5.88E-02 | -2.29E-02 | 3.87E-02 | -9.88E-02 | 5.30E-02 | -1.27E-02 | 3.87E-02 | -8.87E-02 | 6.32E-02 |
| HCT | 1.23E-01 | 5.66E-02 | 1.23E-02 | 2.34E-01 | 1.32E-01 | 5.70E-02 | 1.98E-02 | 2.43E-01 | 1.49E-01 | 5.54E-02 | 4.00E-02 | 2.57E-01 |
| Sodium | 1.60E-02 | 1.39E-02 | -1.13E-02 | 4.33E-02 | 1.75E-02 | 1.38E-02 | -9.58E-03 | 4.46E-02 | 1.46E-02 | 1.36E-02 | -1.21E-02 | 4.14E-02 |
| Potassium | -1.30E-03 | 1.38E-01 | -2.71E-01 | 2.69E-01 | 2.16E-02 | 1.33E-01 | -2.39E-01 | 2.82E-01 | 3.96E-04 | 1.31E-01 | -2.56E-01 | 2.57E-01 |
| Calcium | -2.34E-01 | 1.06E-01 | -4.41E-01 | -2.69E-02 | -2.46E-01 | 1.01E-01 | -4.45E-01 | -4.74E-02 | -2.35E-01 | 9.78E-02 | -4.26E-01 | -4.29E-02 |
| Glucose | 1.12E-03 | 1.13E-03 | -1.09E-03 | 3.33E-03 | 1.25E-03 | 1.07E-03 | -8.46E-04 | 3.35E-03 | 7.70E-04 | 1.05E-03 | -1.29E-03 | 2.83E-03 |
| PH | 3.03E-01 | 1.48E+00 | -2.59E+00 | 3.20E+00 | 6.53E-01 | 1.42E+00 | -2.12E+00 | 3.43E+00 | 3.40E-01 | 1.29E+00 | -2.20E+00 | 2.88E+00 |
| PCO2 | 1.01E-02 | 8.17E-03 | -5.89E-03 | 2.61E-02 | 7.36E-03 | 8.08E-03 | -8.48E-03 | 2.32E-02 | 4.00E-03 | 9.10E-03 | -1.38E-02 | 2.18E-02 |
| PO2 | -3.70E-03 | 2.34E-03 | -8.28E-03 | 8.75E-04 | -4.21E-03 | 2.69E-03 | -9.49E-03 | 1.07E-03 | -3.11E-03 | 2.24E-03 | -7.50E-03 | 1.28E-03 |
| Lac | -3.05E-01 | 1.07E-01 | -5.15E-01 | -9.45E-02 | -3.09E-01 | 1.22E-01 | -5.48E-01 | -6.99E-02 | -2.03E-01 | 1.03E-01 | -4.05E-01 | -6.22E-04 |
| PT | 1.55E-02 | 2.84E-01 | -5.42E-01 | 5.73E-01 | 1.94E-02 | 2.60E-01 | -4.90E-01 | 5.29E-01 | 2.17E-02 | 2.21E-01 | -4.12E-01 | 4.56E-01 |
| APTT | 7.61E-04 | 4.60E-03 | -8.26E-03 | 9.79E-03 | 1.28E-03 | 4.63E-03 | -7.80E-03 | 1.04E-02 | -4.57E-04 | 4.82E-03 | -9.91E-03 | 9.00E-03 |
| INR | -8.28E-01 | 2.97E+00 | -6.65E+00 | 4.99E+00 | -9.14E-01 | 2.75E+00 | -6.30E+00 | 4.47E+00 | -1.14E+00 | 2.36E+00 | -5.76E+00 | 3.49E+00 |
| TBIL | -2.11E-01 | 1.44E-01 | -4.94E-01 | 7.13E-02 | -2.32E-01 | 1.31E-01 | -4.88E-01 | 2.39E-02 | -1.64E-01 | 1.22E-01 | -4.03E-01 | 7.40E-02 |
| BUN | 2.44E-02 | 4.48E-03 | 1.57E-02 | 3.32E-02 | 2.35E-02 | 4.35E-03 | 1.50E-02 | 3.20E-02 | 2.48E-02 | 4.31E-03 | 1.63E-02 | 3.32E-02 |
| Scr | -1.79E-01 | 6.58E-02 | -3.08E-01 | -5.04E-02 | -1.70E-01 | 6.74E-02 | -3.02E-01 | -3.80E-02 | -1.71E-01 | 6.51E-02 | -2.99E-01 | -4.35E-02 |
| OI | -2.22E-04 | 4.76E-04 | -1.16E-03 | 7.11E-04 | -2.57E-04 | 6.48E-04 | -1.53E-03 | 1.01E-03 | -4.28E-05 | 5.14E-04 | -1.05E-03 | 9.65E-04 |
| HRmin | 2.78E-03 | 7.73E-03 | -1.24E-02 | 1.79E-02 | 1.10E-03 | 7.82E-03 | -1.42E-02 | 1.64E-02 | 1.26E-03 | 7.88E-03 | -1.42E-02 | 1.67E-02 |
| HRmax | 4.01E-02 | 6.61E-03 | 2.72E-02 | 5.31E-02 | 4.11E-02 | 6.69E-03 | 2.80E-02 | 5.42E-02 | 4.21E-02 | 6.60E-03 | 2.92E-02 | 5.51E-02 |
| Tmin | 1.98E-02 | 3.92E-02 | -5.71E-02 | 9.66E-02 | 2.12E-02 | 3.97E-02 | -5.65E-02 | 9.89E-02 | 1.62E-02 | 3.73E-02 | -5.68E-02 | 8.93E-02 |
| Tmax | 1.89E-02 | 2.96E-02 | -3.91E-02 | 7.69E-02 | 1.66E-02 | 3.18E-02 | -4.57E-02 | 7.89E-02 | 1.11E-02 | 2.99E-02 | -4.76E-02 | 6.97E-02 |
| MAPmin | -2.15E-02 | 8.69E-03 | -3.85E-02 | -4.48E-03 | -2.34E-02 | 9.24E-03 | -4.15E-02 | -5.25E-03 | -2.12E-02 | 8.75E-03 | -3.83E-02 | -4.01E-03 |
| MAPmax | -1.08E-02 | 7.46E-03 | -2.54E-02 | 3.83E-03 | -1.82E-02 | 8.44E-03 | -3.47E-02 | -1.60E-03 | -1.97E-02 | 8.30E-03 | -3.60E-02 | -3.47E-03 |
| OImin | -2.88E-04 | 5.09E-04 | -1.28E-03 | 7.09E-04 | -1.55E-04 | 5.78E-04 | -1.29E-03 | 9.77E-04 | -3.55E-04 | 5.16E-04 | -1.37E-03 | 6.56E-04 |
| OImax | -3.97E-04 | 2.76E-04 | -9.38E-04 | 1.44E-04 | -5.30E-04 | 3.04E-04 | -1.13E-03 | 6.60E-05 | -4.61E-04 | 2.88E-04 | -1.03E-03 | 1.03E-04 |
| PTmin | 1.69E-01 | 2.59E-01 | -3.39E-01 | 6.76E-01 | 1.66E-01 | 2.30E-01 | -2.84E-01 | 6.17E-01 | 1.35E-01 | 1.99E-01 | -2.54E-01 | 5.25E-01 |
| PTmax | 9.07E-02 | 5.20E-02 | -1.12E-02 | 1.93E-01 | 1.01E-01 | 5.36E-02 | -4.31E-03 | 2.06E-01 | 1.06E-01 | 5.27E-02 | 2.96E-03 | 2.09E-01 |
| INRmin | -7.17E-01 | 2.64E+00 | -5.89E+00 | 4.46E+00 | -7.15E-01 | 2.33E+00 | -5.27E+00 | 3.84E+00 | -3.57E-01 | 2.00E+00 | -4.27E+00 | 3.56E+00 |
| INRmax | -9.94E-01 | 5.53E-01 | -2.08E+00 | 9.09E-02 | -1.10E+00 | 5.77E-01 | -2.23E+00 | 3.16E-02 | -1.15E+00 | 5.59E-01 | -2.25E+00 | -5.64E-02 |
| APTTmin | 1.51E-02 | 8.77E-03 | -2.09E-03 | 3.23E-02 | 1.50E-02 | 8.74E-03 | -2.11E-03 | 3.22E-02 | 1.57E-02 | 8.52E-03 | -1.04E-03 | 3.23E-02 |
| APTTmax | 2.19E-03 | 3.34E-03 | -4.36E-03 | 8.74E-03 | 1.65E-03 | 3.20E-03 | -4.63E-03 | 7.93E-03 | 2.84E-03 | 3.32E-03 | -3.67E-03 | 9.35E-03 |
| TBILmin | 2.50E-01 | 1.78E-01 | -9.84E-02 | 5.97E-01 | 2.90E-01 | 1.66E-01 | -3.43E-02 | 6.15E-01 | 2.51E-01 | 1.63E-01 | -6.88E-02 | 5.70E-01 |
| TBILmax | -6.70E-03 | 6.11E-02 | -1.26E-01 | 1.13E-01 | 4.19E-03 | 6.52E-02 | -1.24E-01 | 1.32E-01 | -1.28E-02 | 6.84E-02 | -1.47E-01 | 1.21E-01 |
| Lac_min | 1.02E-01 | 1.17E-01 | -1.28E-01 | 3.31E-01 | 8.72E-02 | 1.25E-01 | -1.58E-01 | 3.32E-01 | 9.48E-02 | 1.29E-01 | -1.57E-01 | 3.47E-01 |
| Lac_max | 3.79E-01 | 5.76E-02 | 2.66E-01 | 4.92E-01 | 3.78E-01 | 6.86E-02 | 2.44E-01 | 5.13E-01 | 3.18E-01 | 7.38E-02 | 1.73E-01 | 4.62E-01 |

Abbreviations and Notes: Unless otherwise specified, all variables are measured within 24 hours of admission. The suffix 'max' denotes the maximum value of the variable during hospitalization, and 'min' denotes the minimum value.HR: Heart Rate; MAP: Mean Arterial Pressure; WBC: White Blood Cell; RBC: Red Blood Cell; PLT: Platelet; HGB: Hemoglobin; RDW: Red Cell Distribution Width; HCT: Hematocrit; PH: pH; PCO2: Partial Pressure of Carbon Dioxide; PO2: Partial Pressure of Oxygen; Lac: Lactate; PT: Prothrombin Time; APTT: Activated Partial Thromboplastin Time; INR: International Normalized Ratio; TBIL: Total Bilirubin; BUN: Blood Urea Nitrogen; Scr: Serum Creatinine; OI: Oxygenation Index. The judgment criterion is as follows: if the overlap of confidence intervals generated by different 'm' values exceeds 70%, it is considered to indicate low sensitivity. The confidence interval overlap for the variables Temperature, MAP, PLT, HGB, Potassium, Glucose, PCO2, Lac, TBIL, MAPmax, INRmin, and Lac_max was below 70%; therefore, the more robust Predictive Mean Matching (pmm) method was considered for imputation.
