# Supplementary material
Source: Research Square preprint supplement (doi:10.21203/rs.3.rs-8494372/v1)
Supplement: Supplementary file 7 [file 70de132039df7416dc11aeda.docx]

Table S9. Results of Multivariable Logistic Regression Analysis

| **Variable** | **Coefficient** | **Std.Error** | **z_value** | **p_value** | **OR** | **OR_lower_95%** | **OR_upper_95%** |
| --- | --- | --- | --- | --- | --- | --- | --- |
| (Intercept) | -4.547 | 0.937 | -4.853 | 0.000 | 0.011 | 0.002 | 0.065 |
| Age | 0.037 | 0.007 | 5.650 | 0.000 | 1.038 | 1.025 | 1.051 |
| BMI | -0.045 | 0.014 | -3.294 | 0.001 | 0.956 | 0.930 | 0.982 |
| Lac | -1.234 | 0.170 | -7.241 | 0.000 | 0.291 | 0.207 | 0.404 |
| OI | -0.002 | 0.000 | -6.450 | 0.000 | 0.998 | 0.998 | 0.999 |
| HRmax | 0.018 | 0.006 | 3.118 | 0.002 | 1.018 | 1.007 | 1.030 |
| Lac_max | 1.561 | 0.140 | 11.179 | 0.000 | 4.766 | 3.648 | 6.311 |
| CRRT | 2.502 | 0.304 | 8.228 | 0.000 | 12.201 | 6.826 | 22.560 |
| Stroke | -1.002 | 0.371 | -2.697 | 0.007 | 0.367 | 0.170 | 0.734 |

Abbreviations and Notes: Unless otherwise specified, variables refer to values within 24 hours of admission. The suffix "max" indicates the maximum value of the variable during hospitalization, and the suffix "min" indicates the minimum value during hospitalization.BMI: Body Mass Index;Lac: Lactate;OI: Oxygenation Index;HR: Heart Rate;CRRT: Continuous Renal Replacement Therapy
