# Supplementary material
Source: Research Square preprint supplement (doi:10.21203/rs.3.rs-8494372/v1)
Supplement: Supplementary file 9 [file ced3d68795aae61375485ef0.docx]

Table S7. Sensitivity Analysis of Different Imputation Methods in the MICE Algorithm(eICU-CRD)

| **term** | **norm** | | | | **pmm** | | | | **cart** | | | |
| --- | --- | --- | --- | --- | --- | --- | --- | --- | --- | --- | --- | --- |
| **estimate** | **std.error** | **lower** | **upper** | **estimate** | **std.error** | **lower** | **upper** | **estimate** | **std.error** | **lower** | **upper** |
| (Intercept) | 1.99E+01 | 2.42E+01 | -2.75E+01 | 6.73E+01 | 1.72E+01 | 2.46E+01 | -3.10E+01 | 6.54E+01 | 1.50E+01 | 2.26E+01 | -2.92E+01 | 5.93E+01 |
| Weight | -1.79E-02 | 9.14E-03 | -3.58E-02 | 4.96E-05 | -1.77E-02 | 9.33E-03 | -3.60E-02 | 5.76E-04 | -1.77E-02 | 9.47E-03 | -3.62E-02 | 8.95E-04 |
| Height | -8.18E-03 | 5.92E-03 | -1.98E-02 | 3.43E-03 | -6.83E-03 | 5.60E-03 | -1.78E-02 | 4.14E-03 | -6.07E-03 | 5.66E-03 | -1.72E-02 | 5.02E-03 |
| HR | -3.56E-02 | 1.50E-02 | -6.50E-02 | -6.16E-03 | -3.36E-02 | 1.41E-02 | -6.12E-02 | -5.91E-03 | -3.62E-02 | 1.44E-02 | -6.45E-02 | -7.90E-03 |
| Temperature | 4.97E-01 | 3.36E-01 | -1.62E-01 | 1.16E+00 | 3.80E-01 | 3.26E-01 | -2.60E-01 | 1.02E+00 | 3.22E-01 | 3.34E-01 | -3.32E-01 | 9.76E-01 |
| MAP | 5.10E-02 | 2.23E-02 | 7.36E-03 | 9.47E-02 | 4.56E-02 | 1.97E-02 | 6.94E-03 | 8.43E-02 | 4.50E-02 | 2.09E-02 | 3.97E-03 | 8.59E-02 |
| WBC | -5.12E-02 | 2.68E-02 | -1.04E-01 | 1.30E-03 | -5.26E-02 | 2.72E-02 | -1.06E-01 | 6.81E-04 | -6.32E-02 | 2.67E-02 | -1.16E-01 | -1.09E-02 |
| RBC | -4.62E-01 | 4.08E-01 | -1.26E+00 | 3.38E-01 | -4.14E-01 | 4.41E-01 | -1.28E+00 | 4.51E-01 | -3.63E-01 | 3.89E-01 | -1.13E+00 | 4.00E-01 |
| PLT | 5.22E-03 | 2.67E-03 | -1.20E-05 | 1.04E-02 | 5.46E-03 | 2.71E-03 | 1.59E-04 | 1.08E-02 | 4.27E-03 | 2.57E-03 | -7.66E-04 | 9.32E-03 |
| HGB | -3.52E-01 | 3.41E-01 | -1.02E+00 | 3.17E-01 | -3.35E-01 | 3.33E-01 | -9.87E-01 | 3.18E-01 | -2.51E-01 | 3.23E-01 | -8.85E-01 | 3.83E-01 |
| RDW | 2.85E-02 | 5.86E-02 | -8.64E-02 | 1.43E-01 | 1.52E-02 | 6.64E-02 | -1.15E-01 | 1.45E-01 | 1.89E-02 | 5.94E-02 | -9.75E-02 | 1.35E-01 |
| HCT | 1.59E-01 | 1.23E-01 | -8.32E-02 | 4.00E-01 | 1.45E-01 | 1.19E-01 | -8.90E-02 | 3.78E-01 | 1.11E-01 | 1.13E-01 | -1.11E-01 | 3.33E-01 |
| Sodium | -3.87E-02 | 2.53E-02 | -8.82E-02 | 1.08E-02 | -2.79E-02 | 2.43E-02 | -7.55E-02 | 1.98E-02 | -3.32E-02 | 2.41E-02 | -8.04E-02 | 1.40E-02 |
| Potassium | -4.03E-01 | 2.49E-01 | -8.92E-01 | 8.60E-02 | -4.18E-01 | 2.50E-01 | -9.08E-01 | 7.32E-02 | -3.51E-01 | 2.43E-01 | -8.27E-01 | 1.24E-01 |
| Calcium | 1.75E-01 | 1.86E-01 | -1.90E-01 | 5.40E-01 | 1.19E-01 | 1.82E-01 | -2.38E-01 | 4.75E-01 | 1.33E-01 | 1.71E-01 | -2.02E-01 | 4.68E-01 |
| Glucose | -4.52E-04 | 2.79E-03 | -5.92E-03 | 5.02E-03 | 9.36E-04 | 2.52E-03 | -4.01E-03 | 5.88E-03 | 2.19E-04 | 2.67E-03 | -5.02E-03 | 5.46E-03 |
| PH | 1.88E+00 | 2.59E+00 | -3.20E+00 | 6.96E+00 | 2.10E+00 | 2.80E+00 | -3.40E+00 | 7.59E+00 | 2.25E+00 | 2.74E+00 | -3.12E+00 | 7.61E+00 |
| PCO2 | 2.96E-04 | 1.77E-02 | -3.45E-02 | 3.51E-02 | 4.72E-03 | 1.80E-02 | -3.06E-02 | 4.00E-02 | 4.54E-03 | 1.76E-02 | -2.99E-02 | 3.90E-02 |
| PO2 | -1.28E-03 | 4.70E-03 | -1.05E-02 | 7.93E-03 | -1.35E-03 | 3.59E-03 | -8.39E-03 | 5.68E-03 | -1.62E-03 | 3.51E-03 | -8.51E-03 | 5.26E-03 |
| Lac | 1.05E-01 | 1.79E-01 | -2.46E-01 | 4.57E-01 | 2.72E-02 | 1.28E-01 | -2.23E-01 | 2.77E-01 | 4.26E-02 | 1.31E-01 | -2.13E-01 | 2.99E-01 |
| PT | 1.55E-01 | 9.37E-02 | -2.85E-02 | 3.39E-01 | 1.53E-01 | 1.03E-01 | -4.90E-02 | 3.56E-01 | 8.46E-02 | 8.72E-02 | -8.64E-02 | 2.56E-01 |
| APTT | -1.96E-02 | 2.39E-02 | -6.65E-02 | 2.72E-02 | -1.52E-02 | 2.48E-02 | -6.39E-02 | 3.35E-02 | -1.04E-02 | 2.16E-02 | -5.27E-02 | 3.20E-02 |
| INR | -1.48E+00 | 8.20E-01 | -3.09E+00 | 1.25E-01 | -1.51E+00 | 8.96E-01 | -3.27E+00 | 2.42E-01 | -8.73E-01 | 7.78E-01 | -2.40E+00 | 6.53E-01 |
| TBIL | -6.17E-01 | 3.30E-01 | -1.26E+00 | 3.06E-02 | -4.38E-01 | 3.00E-01 | -1.02E+00 | 1.49E-01 | -3.67E-01 | 2.63E-01 | -8.81E-01 | 1.48E-01 |
| BUN | 1.38E-02 | 9.75E-03 | -5.30E-03 | 3.29E-02 | 1.30E-02 | 9.50E-03 | -5.58E-03 | 3.17E-02 | 1.54E-02 | 1.01E-02 | -4.35E-03 | 3.51E-02 |
| Scr | -9.52E-03 | 5.09E-01 | -1.01E+00 | 9.87E-01 | 1.06E-01 | 4.88E-01 | -8.50E-01 | 1.06E+00 | 9.75E-02 | 4.62E-01 | -8.09E-01 | 1.00E+00 |
| OI | 8.99E-05 | 7.95E-05 | -6.59E-05 | 2.46E-04 | 1.04E-04 | 8.39E-05 | -6.07E-05 | 2.68E-04 | 1.24E-04 | 8.07E-05 | -3.40E-05 | 2.82E-04 |
| SAPSⅢ | -6.48E-03 | 9.02E-03 | -2.42E-02 | 1.12E-02 | -2.29E-03 | 8.69E-03 | -1.93E-02 | 1.47E-02 | 3.42E-04 | 8.83E-03 | -1.70E-02 | 1.77E-02 |
| HRmin | 1.17E-02 | 1.38E-02 | -1.54E-02 | 3.88E-02 | 1.39E-02 | 1.51E-02 | -1.56E-02 | 4.34E-02 | 1.23E-02 | 1.77E-02 | -2.24E-02 | 4.70E-02 |
| HRmax | 4.65E-02 | 1.37E-02 | 1.96E-02 | 7.33E-02 | 4.25E-02 | 1.49E-02 | 1.32E-02 | 7.18E-02 | 3.89E-02 | 1.48E-02 | 9.81E-03 | 6.79E-02 |
| Tmin | -1.11E+00 | 3.78E-01 | -1.86E+00 | -3.73E-01 | -1.00E+00 | 3.76E-01 | -1.74E+00 | -2.64E-01 | -1.04E+00 | 4.03E-01 | -1.83E+00 | -2.45E-01 |
| Tmax | -9.42E-02 | 3.10E-01 | -7.01E-01 | 5.13E-01 | -9.66E-02 | 3.19E-01 | -7.22E-01 | 5.29E-01 | 3.42E-02 | 2.95E-01 | -5.45E-01 | 6.13E-01 |
| MAPmin | -6.26E-02 | 2.04E-02 | -1.03E-01 | -2.27E-02 | -6.44E-02 | 1.96E-02 | -1.03E-01 | -2.59E-02 | -6.04E-02 | 1.88E-02 | -9.72E-02 | -2.36E-02 |
| MAPmax | -3.52E-02 | 1.66E-02 | -6.78E-02 | -2.69E-03 | -2.84E-02 | 1.57E-02 | -5.92E-02 | 2.33E-03 | -3.07E-02 | 1.74E-02 | -6.48E-02 | 3.49E-03 |
| OImin | -1.47E-05 | 9.24E-05 | -1.96E-04 | 1.66E-04 | -6.09E-05 | 9.53E-05 | -2.48E-04 | 1.26E-04 | -1.27E-05 | 1.03E-04 | -2.15E-04 | 1.90E-04 |
| OImax | -6.53E-07 | 6.30E-05 | -1.24E-04 | 1.23E-04 | -1.60E-06 | 6.10E-05 | -1.21E-04 | 1.18E-04 | -1.69E-05 | 6.43E-05 | -1.43E-04 | 1.09E-04 |
| WBCmin | 1.35E-01 | 3.73E-02 | 6.19E-02 | 2.08E-01 | 1.26E-01 | 3.59E-02 | 5.54E-02 | 1.96E-01 | 1.45E-01 | 3.69E-02 | 7.26E-02 | 2.17E-01 |
| WBCmax | -7.38E-03 | 2.37E-02 | -5.38E-02 | 3.91E-02 | -2.99E-03 | 2.41E-02 | -5.02E-02 | 4.43E-02 | -3.08E-03 | 2.34E-02 | -4.90E-02 | 4.29E-02 |
| PLTmin | 3.04E-04 | 2.78E-03 | -5.15E-03 | 5.76E-03 | 9.45E-05 | 2.55E-03 | -4.90E-03 | 5.09E-03 | 3.63E-04 | 2.49E-03 | -4.51E-03 | 5.24E-03 |
| PLTmax | -3.17E-03 | 2.56E-03 | -8.18E-03 | 1.84E-03 | -3.17E-03 | 2.55E-03 | -8.16E-03 | 1.83E-03 | -2.43E-03 | 2.52E-03 | -7.36E-03 | 2.50E-03 |
| PTmin | 1.64E-01 | 1.58E-01 | -1.46E-01 | 4.73E-01 | 1.88E-01 | 1.70E-01 | -1.46E-01 | 5.21E-01 | 1.36E-01 | 1.53E-01 | -1.64E-01 | 4.37E-01 |
| PTmax | -2.33E-01 | 8.47E-02 | -3.99E-01 | -6.71E-02 | -2.65E-01 | 1.28E-01 | -5.16E-01 | -1.43E-02 | -1.45E-01 | 7.61E-02 | -2.94E-01 | 4.55E-03 |
| INRmin | -1.41E+00 | 1.52E+00 | -4.38E+00 | 1.57E+00 | -1.43E+00 | 1.45E+00 | -4.27E+00 | 1.40E+00 | -9.86E-01 | 1.41E+00 | -3.76E+00 | 1.79E+00 |
| INRmax | 1.99E+00 | 7.13E-01 | 5.97E-01 | 3.39E+00 | 2.20E+00 | 9.91E-01 | 2.52E-01 | 4.14E+00 | 1.14E+00 | 6.21E-01 | -8.04E-02 | 2.36E+00 |
| APTTmin | 2.26E-02 | 2.36E-02 | -2.38E-02 | 6.89E-02 | 1.69E-02 | 2.78E-02 | -3.75E-02 | 7.13E-02 | 2.93E-02 | 2.46E-02 | -1.89E-02 | 7.74E-02 |
| APTTmax | -8.67E-03 | 1.16E-02 | -3.15E-02 | 1.41E-02 | -1.08E-02 | 1.17E-02 | -3.37E-02 | 1.20E-02 | -8.51E-03 | 1.22E-02 | -3.25E-02 | 1.55E-02 |
| Scr_min | -1.11E-01 | 5.41E-01 | -1.17E+00 | 9.49E-01 | -1.23E-01 | 5.11E-01 | -1.12E+00 | 8.78E-01 | -3.01E-01 | 4.80E-01 | -1.24E+00 | 6.40E-01 |
| Scr_max | 1.90E-02 | 1.61E-01 | -2.97E-01 | 3.35E-01 | -1.76E-02 | 1.66E-01 | -3.43E-01 | 3.08E-01 | 3.70E-03 | 1.62E-01 | -3.14E-01 | 3.21E-01 |
| TBILmin | -1.75E-01 | 1.70E-01 | -5.09E-01 | 1.59E-01 | -1.76E-01 | 2.02E-01 | -5.73E-01 | 2.20E-01 | -7.81E-02 | 1.50E-01 | -3.72E-01 | 2.16E-01 |
| TBILmax | 3.12E-01 | 1.31E-01 | 5.39E-02 | 5.69E-01 | 3.32E-01 | 1.72E-01 | -5.63E-03 | 6.69E-01 | 1.97E-01 | 1.24E-01 | -4.56E-02 | 4.39E-01 |
| Lac_min | -7.45E-02 | 1.84E-01 | -4.35E-01 | 2.86E-01 | -5.41E-02 | 2.03E-01 | -4.51E-01 | 3.43E-01 | -8.60E-02 | 1.75E-01 | -4.30E-01 | 2.58E-01 |
| Lac_max | 6.87E-02 | 1.65E-01 | -2.54E-01 | 3.92E-01 | 1.03E-01 | 1.43E-01 | -1.76E-01 | 3.83E-01 | 1.49E-01 | 1.38E-01 | -1.22E-01 | 4.21E-01 |

Abbreviations and Notes: Unless otherwise specified, all variables are measured within 24 hours of admission. The suffix 'max' denotes the maximum value of the variable during hospitalization, and 'min' denotes the minimum value.HR: Heart Rate; MAP: Mean Arterial Pressure; WBC: White Blood Cell; RBC: Red Blood Cell; PLT: Platelet; HGB: Hemoglobin; RDW: Red Cell Distribution Width; HCT: Hematocrit; PH: pH; PCO2: Partial Pressure of Carbon Dioxide; PO2: Partial Pressure of Oxygen; Lac: Lactate; PT: Prothrombin Time; APTT: Activated Partial Thromboplastin Time; INR: International Normalized Ratio; TBIL: Total Bilirubin; BUN: Blood Urea Nitrogen; Scr: Serum Creatinine; OI: Oxygenation Index; SAPS III: Simplified Acute Physiology Score III. The judgment criterion is as follows: if the overlap of confidence intervals generated by different 'm' values exceeds 70%, it is considered to indicate low sensitivity. The overlap of confidence intervals calculated for all variables exceeded 70%.
