# Supplementary material
Source: Research Square preprint supplement (doi:10.21203/rs.3.rs-8494372/v1)
Supplement: Supplementary file 10 [file ec51d51bedee60876721ed1f.docx]

Table S3. Results of Variance Decomposition Evaluation for MICE Imputation Method in the Study Cohort of eICU-CRD Database

| **term** | **estimate** | **ubar** | **b** | **t** | **b_over_u** | **RE** |
| --- | --- | --- | --- | --- | --- | --- |
| (Intercept) | 1.99E+01 | 4.63E+02 | 1.01E+02 | 5.84E+02 | 2.17E-01 | 7.93E-01 |
| Weight | -1.79E-02 | 8.31E-05 | 4.04E-07 | 8.36E-05 | 4.86E-03 | 9.94E-01 |
| Height | -8.18E-03 | 3.10E-05 | 3.35E-06 | 3.50E-05 | 1.08E-01 | 8.85E-01 |
| HR | -3.56E-02 | 1.79E-04 | 3.83E-05 | 2.25E-04 | 2.13E-01 | 7.96E-01 |
| Temperature | 4.97E-01 | 1.04E-01 | 7.07E-03 | 1.13E-01 | 6.77E-02 | 9.25E-01 |
| MAP | 5.10E-02 | 3.17E-04 | 1.49E-04 | 4.96E-04 | 4.71E-01 | 6.39E-01 |
| WBC | -5.12E-02 | 6.66E-04 | 4.29E-05 | 7.17E-04 | 6.45E-02 | 9.28E-01 |
| RBC | -4.62E-01 | 1.58E-01 | 7.32E-03 | 1.66E-01 | 4.65E-02 | 9.47E-01 |
| PLT | 5.22E-03 | 6.58E-06 | 4.47E-07 | 7.12E-06 | 6.79E-02 | 9.25E-01 |
| HGB | -3.52E-01 | 1.05E-01 | 9.24E-03 | 1.16E-01 | 8.77E-02 | 9.05E-01 |
| RDW | 2.85E-02 | 3.20E-03 | 1.93E-04 | 3.44E-03 | 6.03E-02 | 9.33E-01 |
| HCT | 1.59E-01 | 1.37E-02 | 1.27E-03 | 1.52E-02 | 9.28E-02 | 9.00E-01 |
| Sodium | -3.87E-02 | 5.69E-04 | 5.71E-05 | 6.38E-04 | 1.00E-01 | 8.92E-01 |
| Potassium | -4.03E-01 | 5.70E-02 | 4.40E-03 | 6.22E-02 | 7.72E-02 | 9.15E-01 |
| Calcium | 1.75E-01 | 2.85E-02 | 5.23E-03 | 3.47E-02 | 1.84E-01 | 8.19E-01 |
| Glucose | -4.52E-04 | 5.82E-06 | 1.64E-06 | 7.79E-06 | 2.82E-01 | 7.47E-01 |
| PH | 1.88E+00 | 5.44E+00 | 1.07E+00 | 6.72E+00 | 1.96E-01 | 8.09E-01 |
| PCO2 | 2.96E-04 | 2.27E-04 | 7.36E-05 | 3.15E-04 | 3.25E-01 | 7.19E-01 |
| PO2 | -1.28E-03 | 1.13E-05 | 8.95E-06 | 2.21E-05 | 7.90E-01 | 5.13E-01 |
| Lac | 1.05E-01 | 1.46E-02 | 1.46E-02 | 3.21E-02 | 1.00E+00 | 4.54E-01 |
| PT | 1.55E-01 | 8.30E-03 | 3.97E-04 | 8.77E-03 | 4.79E-02 | 9.46E-01 |
| APTT | -1.96E-02 | 3.57E-04 | 1.79E-04 | 5.72E-04 | 5.01E-01 | 6.25E-01 |
| INR | -1.48E+00 | 6.37E-01 | 3.00E-02 | 6.73E-01 | 4.72E-02 | 9.46E-01 |
| TBIL | -6.17E-01 | 7.16E-02 | 3.13E-02 | 1.09E-01 | 4.37E-01 | 6.56E-01 |
| BUN | 1.38E-02 | 7.92E-05 | 1.32E-05 | 9.50E-05 | 1.67E-01 | 8.33E-01 |
| Scr | -9.52E-03 | 1.99E-01 | 4.93E-02 | 2.59E-01 | 2.47E-01 | 7.71E-01 |
| OI | 8.99E-05 | 5.86E-09 | 3.75E-10 | 6.31E-09 | 6.40E-02 | 9.29E-01 |
| SAPSⅢ | -6.48E-03 | 6.97E-05 | 9.65E-06 | 8.13E-05 | 1.38E-01 | 8.58E-01 |
| HRmin | 1.17E-02 | 1.59E-04 | 2.72E-05 | 1.92E-04 | 1.71E-01 | 8.30E-01 |
| HRmax | 4.65E-02 | 1.79E-04 | 7.71E-06 | 1.88E-04 | 4.32E-02 | 9.51E-01 |
| Tmin | -1.11E+00 | 1.28E-01 | 1.26E-02 | 1.43E-01 | 9.82E-02 | 8.95E-01 |
| Tmax | -9.42E-02 | 8.89E-02 | 5.81E-03 | 9.59E-02 | 6.53E-02 | 9.27E-01 |
| MAPmin | -6.26E-02 | 3.20E-04 | 8.03E-05 | 4.16E-04 | 2.51E-01 | 7.68E-01 |
| MAPmax | -3.52E-02 | 2.18E-04 | 4.83E-05 | 2.76E-04 | 2.22E-01 | 7.90E-01 |
| OImin | -1.47E-05 | 7.31E-09 | 1.02E-09 | 8.54E-09 | 1.40E-01 | 8.56E-01 |
| OImax | -6.53E-07 | 3.69E-09 | 2.29E-10 | 3.97E-09 | 6.21E-02 | 9.31E-01 |
| WBCmin | 1.35E-01 | 1.26E-03 | 1.08E-04 | 1.39E-03 | 8.56E-02 | 9.07E-01 |
| WBCmax | -7.38E-03 | 5.42E-04 | 1.62E-05 | 5.61E-04 | 2.99E-02 | 9.65E-01 |
| PLTmin | 3.04E-04 | 6.64E-06 | 9.29E-07 | 7.76E-06 | 1.40E-01 | 8.56E-01 |
| PLTmax | -3.17E-03 | 6.37E-06 | 1.31E-07 | 6.53E-06 | 2.06E-02 | 9.76E-01 |
| PTmin | 1.64E-01 | 1.70E-02 | 6.59E-03 | 2.49E-02 | 3.88E-01 | 6.83E-01 |
| PTmax | -2.33E-01 | 5.31E-03 | 1.56E-03 | 7.18E-03 | 2.93E-01 | 7.40E-01 |
| INRmin | -1.41E+00 | 1.47E+00 | 6.98E-01 | 2.31E+00 | 4.74E-01 | 6.37E-01 |
| INRmax | 1.99E+00 | 3.82E-01 | 1.05E-01 | 5.08E-01 | 2.74E-01 | 7.52E-01 |
| APTTmin | 2.26E-02 | 4.31E-04 | 1.07E-04 | 5.59E-04 | 2.47E-01 | 7.71E-01 |
| APTTmax | -8.67E-03 | 1.07E-04 | 2.35E-05 | 1.35E-04 | 2.20E-01 | 7.91E-01 |
| Scr_min | -1.11E-01 | 2.46E-01 | 3.86E-02 | 2.93E-01 | 1.57E-01 | 8.42E-01 |
| Scr_max | 1.90E-02 | 2.53E-02 | 6.44E-04 | 2.61E-02 | 2.55E-02 | 9.70E-01 |
| TBILmin | -1.75E-01 | 2.29E-02 | 5.10E-03 | 2.90E-02 | 2.23E-01 | 7.89E-01 |
| TBILmax | 3.12E-01 | 1.52E-02 | 1.72E-03 | 1.73E-02 | 1.13E-01 | 8.80E-01 |
| Lac_min | -7.45E-02 | 2.81E-02 | 4.73E-03 | 3.38E-02 | 1.68E-01 | 8.32E-01 |
| Lac_max | 6.87E-02 | 1.58E-02 | 9.40E-03 | 2.71E-02 | 5.93E-01 | 5.84E-01 |

**Abbreviations and Notes:** Unless otherwise specified, variables are measured within 24 hours of admission. The suffix "max" denotes the maximum value of the variable during hospitalization, and "min" denotes the minimum value.HR: heart rate; MAP: mean arterial pressure;**WBC:** White Blood Cell; **RBC:** Red Blood Cell; **PLT:** Platelet; **HGB:** Hemoglobin; **RDW:** Red Cell Distribution Width; **HCT:** Hematocrit; **PH:** pH; **PCO2:** Partial Pressure of Carbon Dioxide; **PO2:** Partial Pressure of Oxygen; **Lac:** Lactate; **PT:** Prothrombin Time; **APTT:** Activated Partial Thromboplastin Time; **INR:** International Normalized Ratio; **TBIL:** Total Bilirubin; **BUN:** Blood Urea Nitrogen; **Scr:** Serum Creatinine; **OI:** Oxygenation Index; **ubar:** Quantity related to the mean; **b:** Coefficient; **t:** t-statistic; **b_over_u:** Ratio of the coefficient to the error term; **RE:** Random Effects (A b_over_u less than 0.2 suggests relatively small error and good stability; RE greater than 0.8 indicates reasonable control of individual differences and improved predictive capability).
