# Supplementary material
Source: Research Square preprint supplement (doi:10.21203/rs.3.rs-8494372/v1)
Supplement: Supplementary file 11 [file ef2eaed2c2982075b2c886c7.docx]

Table S2. Results of Variance Decomposition Evaluation for MICE Imputation Method in the Study Cohort of MIMIC-IV Database

| **term** | **estimate** | **ubar** | **b** | **t** | **b_over_u** | **RE** |
| --- | --- | --- | --- | --- | --- | --- |
| (Intercept) | -4.17E+00 | 8.24E+01 | 3.13E+01 | 1.20E+02 | 3.80E-01 | 8.87E-01 |
| Weight | -1.44E-02 | 1.16E-05 | 4.88E-07 | 1.22E-05 | 4.22E-02 | 9.52E-01 |
| Height | -3.82E-04 | 5.79E-05 | 2.34E-05 | 8.60E-05 | 4.04E-01 | 8.73E-01 |
| WBC | 1.73E-02 | 9.02E-05 | 4.94E-06 | 9.61E-05 | 5.47E-02 | 9.38E-01 |
| RBC | -6.27E-01 | 6.67E-02 | 5.42E-03 | 7.32E-02 | 8.13E-02 | 9.11E-01 |
| PLT | 6.23E-04 | 5.72E-07 | 2.12E-08 | 5.97E-07 | 3.71E-02 | 9.57E-01 |
| HGB | -7.22E-02 | 2.14E-02 | 5.16E-04 | 2.20E-02 | 2.41E-02 | 9.72E-01 |
| RDW | -1.58E-02 | 1.42E-03 | 3.80E-05 | 1.47E-03 | 2.67E-02 | 9.69E-01 |
| HCT | 1.12E-01 | 2.91E-03 | 9.77E-05 | 3.03E-03 | 3.36E-02 | 9.61E-01 |
| Sodium | 1.31E-02 | 1.78E-04 | 4.82E-06 | 1.84E-04 | 2.71E-02 | 9.69E-01 |
| Potassium | -2.10E-02 | 1.66E-02 | 1.02E-03 | 1.78E-02 | 6.17E-02 | 9.31E-01 |
| Calcium | -1.84E-01 | 9.27E-03 | 7.52E-04 | 1.02E-02 | 8.11E-02 | 9.11E-01 |
| Glucose | 1.07E-03 | 1.08E-06 | 1.15E-07 | 1.22E-06 | 1.06E-01 | 8.87E-01 |
| PH | 1.60E-01 | 1.37E+00 | 5.18E-01 | 1.99E+00 | 3.78E-01 | 8.88E-01 |
| PCO2 | 9.08E-03 | 5.79E-05 | 3.51E-06 | 6.22E-05 | 6.07E-02 | 9.32E-01 |
| PO2 | -3.20E-03 | 4.02E-06 | 7.45E-07 | 4.91E-06 | 1.86E-01 | 8.18E-01 |
| Lac | -3.19E-01 | 6.91E-03 | 3.45E-03 | 1.10E-02 | 5.00E-01 | 8.25E-01 |
| PT | 1.32E-02 | 5.42E-02 | 1.91E-02 | 7.71E-02 | 3.52E-01 | 8.03E-01 |
| APTT | 1.85E-03 | 1.57E-05 | 5.56E-06 | 2.23E-05 | 3.55E-01 | 8.01E-01 |
| INR | -8.36E-01 | 5.95E+00 | 2.11E+00 | 8.48E+00 | 3.55E-01 | 8.02E-01 |
| TBIL | -2.04E-01 | 1.21E-02 | 4.96E-03 | 1.81E-02 | 4.09E-01 | 8.71E-01 |
| BUN | 2.36E-02 | 1.78E-05 | 1.01E-06 | 1.90E-05 | 5.68E-02 | 9.36E-01 |
| Scr | -1.69E-01 | 4.11E-03 | 5.32E-05 | 4.17E-03 | 1.29E-02 | 9.85E-01 |
| OI | -2.58E-04 | 2.16E-07 | 1.55E-09 | 2.18E-07 | 7.20E-03 | 9.91E-01 |
| HRmin | -1.40E-02 | 3.72E-05 | 1.38E-06 | 3.88E-05 | 3.71E-02 | 9.57E-01 |
| HRmax | 2.79E-02 | 3.07E-05 | 4.89E-07 | 3.13E-05 | 1.59E-02 | 9.81E-01 |
| Tmin | -2.25E-02 | 9.27E-04 | 2.59E-05 | 9.59E-04 | 2.79E-02 | 9.68E-01 |
| Tmax | 1.37E-02 | 7.37E-04 | 6.61E-05 | 8.16E-04 | 8.97E-02 | 9.03E-01 |
| MAPmin | -8.60E-03 | 4.95E-05 | 5.01E-06 | 5.56E-05 | 1.01E-01 | 8.92E-01 |
| MAPmax | -4.37E-03 | 1.60E-05 | 7.34E-06 | 2.48E-05 | 4.59E-01 | 8.45E-01 |
| OImin | -5.12E-04 | 1.97E-07 | 4.60E-08 | 2.52E-07 | 2.33E-01 | 8.81E-01 |
| OImax | -2.43E-04 | 7.07E-08 | 3.32E-09 | 7.47E-08 | 4.69E-02 | 9.47E-01 |
| PTmin | 1.73E-01 | 4.66E-02 | 1.49E-02 | 6.45E-02 | 3.20E-01 | 8.22E-01 |
| PTmax | 8.74E-02 | 2.61E-03 | 6.16E-05 | 2.69E-03 | 2.35E-02 | 9.73E-01 |
| INRmin | -8.36E-01 | 4.89E+00 | 1.55E+00 | 6.76E+00 | 3.17E-01 | 7.24E-01 |
| INRmax | -9.48E-01 | 2.98E-01 | 5.64E-03 | 3.05E-01 | 1.89E-02 | 9.78E-01 |
| APTTmin | 1.44E-02 | 7.40E-05 | 1.79E-06 | 7.61E-05 | 2.42E-02 | 9.72E-01 |
| APTTmax | 2.09E-03 | 9.52E-06 | 1.05E-06 | 1.08E-05 | 1.10E-01 | 8.83E-01 |
| TBILmin | 2.37E-01 | 1.99E-02 | 6.36E-03 | 2.75E-02 | 3.19E-01 | 8.23E-01 |
| TBILmax | -3.70E-03 | 3.42E-03 | 2.13E-04 | 3.67E-03 | 6.25E-02 | 9.30E-01 |
| Lac_min | 1.30E-01 | 1.26E-02 | 5.38E-04 | 1.32E-02 | 4.27E-02 | 9.51E-01 |
| Lac_max | 3.77E-01 | 2.84E-03 | 4.15E-04 | 3.34E-03 | 1.46E-01 | 8.51E-01 |

**Abbreviations and Notes:** Unless otherwise specified, variables are measured within 24 hours of admission. The suffix "max" denotes the maximum value of the variable during hospitalization, and "min" denotes the minimum value.**WBC:** White Blood Cell; **RBC:** Red Blood Cell; **PLT:** Platelet; **HGB:** Hemoglobin; **RDW:** Red Cell Distribution Width; **HCT:** Hematocrit; **PH:** pH; **PCO2:** Partial Pressure of Carbon Dioxide; **PO2:** Partial Pressure of Oxygen; **Lac:** Lactate; **PT:** Prothrombin Time; **APTT:** Activated Partial Thromboplastin Time; **INR:** International Normalized Ratio; **TBIL:** Total Bilirubin; **BUN:** Blood Urea Nitrogen; **Scr:** Serum Creatinine; **OI:** Oxygenation Index; **ubar:** Quantity related to the mean; **b:** Coefficient; **t:** t-statistic; **b_over_u:** Ratio of the coefficient to the error term; **RE:** Random Effects (A b_over_u less than 0.2 suggests relatively small error and good stability; RE greater than 0.8 indicates reasonable control of individual differences and improved predictive capability).
